# Supplementary material for: Characterization of Host and Bacterial Contributions to Lung Barrier Dysfunction Following Co-infection with 2009 Pandemic Influenza and Methicillin Resistant Staphylococcus aureus
Source: Viruses. 2019 Jan 29;11(2):116. doi: 10.3390/v11020116 (PMC6409999; doi:10.3390/v11020116)
Supplement: Supplementary file 1 [file viruses-11-00116-s001.pdf]

**Supplementary Data:**

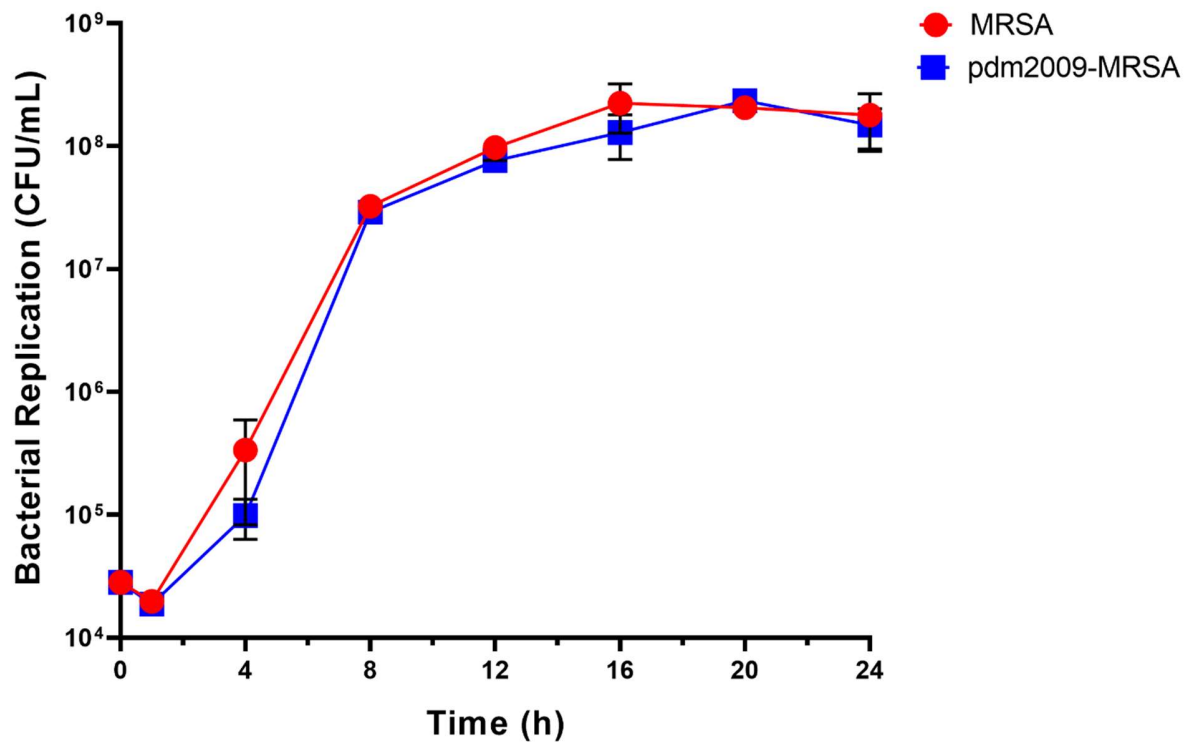

**Figure S1: MRSA replication kinetics during bacterial infection and influenza-bacterial co-infection in HBEC-3KT cells.** HBEC-3KT cells were infected with pdm2009 (MOI 0.1) or mock-infected followed by MRSA infection 24 hours later (MOI 0.1). HBEC-3KT cells were selectively lysed at the indicated time points and CFU were quantified by standard bacterial plating. Error bars represent SEM calculated from at least 3 biological replicates.

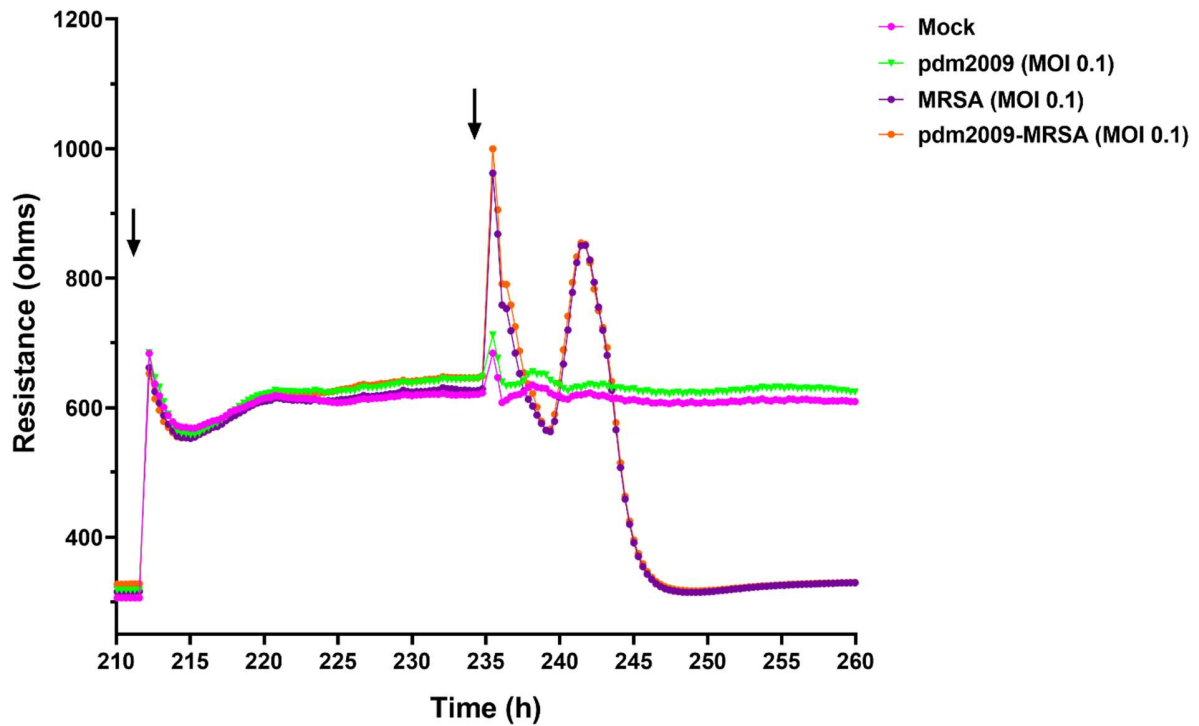

**Figure S2: pdm2009-MRSA infection decreases barrier function in bronchial epithelial cells.** Median resistance values have been plotted for all data points obtained during the experiment. Error bars have been removed to allow for clear visualization of all data sets but were consistent across all biological replicates. HBEC-3KT cells were plated at time 0 and grown to 90% confluency prior to initial infection with pdm2009. Cells were infected or mock-infected with pdm2009 (first arrow) and MRSA was added to cells ~24 hr later (second arrow). MRSA alone, pdm2009 alone and mock-infected time-matched conditions were also analyzed at the indicated time points. MOI values in parentheses signify the MRSA MOI utilized for infection. Resistance data represents the median of at least 3 biological replicates with at least 6 technical replicates per sample per biological replicate.

**Table S1: MRSA RT-qPCR Primer Sequences**

| Gene               | Sequence                |
|--------------------|-------------------------|
| <b><i>16S</i></b>  |                         |
| Forward            | CATGCTGATCTACGATTACT    |
| Reverse            | CCATAAAGTTGTTCTCAGTT    |
| <b><i>hla</i></b>  |                         |
| Forward            | CTGTAGCGAAGTCTGGTGAAA   |
| Reverse            | AGATTCTTGGAACCCGGTATATG |
| <b><i>spA</i></b>  |                         |
| Forward            | GCTGCACCTAAGGCTAATGATA  |
| Reverse            | GATAAGAAGCAACCAGCAAACC  |
| <b><i>fnbB</i></b> |                         |
| Forward            | TGTCGCGCTGTATGATTGT     |
| Reverse            | GTAGAGGAAAGTGGGAGTTCAG  |
| <b><i>icA</i></b>  |                         |
| Forward            | GCAGTAGTTCTTGTCGCATTTC  |
| Reverse            | GTTGGGTATTCCCTCTGTCTG   |
| <b><i>ebpS</i></b> |                         |
| Forward            | GGTGAACCTGAACCGTAGTATT  |
| Reverse            | CAGCAACAACAACGTCAAGG    |

**Table S2: Pathway Overrepresentation Analysis of Host Kinome Responses in Infected Samples (8-12 hr Post-MRSA Infection)****A. pdm2009-MRSA Infection**

| Time | Signaling Pathway                                                            | Uploaded Protein Count | Pathway Upregulated P-Value |
|------|------------------------------------------------------------------------------|------------------------|-----------------------------|
| 8 hr | Intrinsic Pathway for Apoptosis                                              | 12                     | 0.039                       |
|      | BH3-only proteins associate with and inactivate anti-apoptotic BCL-2 members | 4                      | 0.043                       |
|      | Apoptotic signaling in response to dna damage                                | 7                      | 0.058                       |
|      | Cell-Cell communication                                                      | 7                      | 0.058                       |
|      | Amyotrophic lateral sclerosis (ALS)                                          | 10                     | 0.061                       |
|      | p75 NTR receptor-mediated signaling                                          | 10                     | 0.061                       |
|      | Alpha6Beta4Integrin                                                          | 20                     | 0.070                       |
|      | Apoptosis                                                                    | 14                     | 0.085                       |
|      | p75(NTR)-mediated signaling                                                  | 14                     | 0.085                       |

|       |                                                                               |    |       |
|-------|-------------------------------------------------------------------------------|----|-------|
|       | Cell death signaling via NRAGE, NRIF and NADE                                 | 5  | 0.090 |
|       | DEx/H-box helicases activate type I IFN and inflammatory cytokines production | 5  | 0.090 |
|       | EPH-Ephrin signaling                                                          | 5  | 0.090 |
|       | EPHB-mediated forward signaling                                               | 5  | 0.090 |
|       | Metabolism of proteins                                                        | 5  | 0.090 |
|       | Tsp-1 induced apoptosis in microvascular endothelial cell                     | 5  | 0.090 |
|       | Validated targets of C-MYC transcriptional activation                         | 5  | 0.090 |
|       | Viral myocarditis                                                             | 5  | 0.090 |
|       | Apoptosis                                                                     | 21 | 0.092 |
|       | Activation of BH3-only proteins                                               | 8  | 0.095 |
|       | Calcium signaling by hbx of hepatitis b virus                                 | 8  | 0.095 |
|       | Cell surface interactions at the vascular wall                                | 8  | 0.095 |
| 12 hr | Pre-NOTCH Expression and Processing                                           | 3  | 0.049 |
|       | Pre-NOTCH Transcription and Translation                                       | 3  | 0.049 |
|       | TRAF6 mediated IRF7 activation                                                | 7  | 0.054 |
|       | Presenilin action in Notch and Wnt signaling                                  | 8  | 0.078 |
|       | Basal cell carcinoma                                                          | 4  | 0.090 |
|       | Regulation of cell cycle progression by plk3                                  | 4  | 0.090 |
|       | Signaling by NOTCH                                                            | 4  | 0.090 |
|       | TRAF6 mediated IRF7 activation in TLR7/8 or 9 signaling                       | 4  | 0.090 |
|       | The information processing pathway at the ifn beta enhancer                   | 4  | 0.090 |

## B. pdm2009 Infection Alone

| Time | Signaling Pathway                                 | Uploaded Protein Count | Pathway Upregulated P-Value |
|------|---------------------------------------------------|------------------------|-----------------------------|
| 8 hr | IL-13 signaling                                   | 5                      | 0.027                       |
|      | Alzheimer's disease                               | 6                      | 0.049                       |
|      | Amyotrophic lateral sclerosis (ALS)               | 10                     | 0.050                       |
|      | STING mediated induction of host immune responses | 3                      | 0.064                       |
|      | Apoptotic signaling in response to dna damage     | 7                      | 0.077                       |

|       |                                                                       |    |       |
|-------|-----------------------------------------------------------------------|----|-------|
|       | Oxidative Stress Induced Senescence                                   | 12 | 0.095 |
| 12 hr | HIF-1-alpha transcription factor network                              | 6  | 0.002 |
|       | Tsp-1 induced apoptosis in microvascular endothelial cell             | 5  | 0.012 |
|       | TRAF6 mediated IRF7 activation                                        | 7  | 0.035 |
|       | Oxidative Stress Induced Senescence                                   | 12 | 0.036 |
|       | Calcium signaling in the CD4+ TCR pathway                             | 3  | 0.036 |
|       | Caspase cascade in apoptosis                                          | 3  | 0.036 |
|       | Negative regulators of RIG-I/MDA5 signaling                           | 3  | 0.036 |
|       | Pertussis toxin-insensitive ccr5 signaling in macrophage              | 3  | 0.036 |
|       | Pre-NOTCH Expression and Processing                                   | 3  | 0.036 |
|       | Pre-NOTCH Transcription and Translation                               | 3  | 0.036 |
|       | Calcineurin-regulated NFAT-dependent transcription in lymphocytes     | 8  | 0.052 |
|       | Calcium signaling by hbx of hepatitis b virus                         | 8  | 0.052 |
|       | Calcium signaling pathway                                             | 8  | 0.052 |
|       | Endothelins                                                           | 8  | 0.052 |
|       | Regulation of Telomerase                                              | 8  | 0.052 |
|       | LPA receptor mediated events                                          | 14 | 0.062 |
|       | Wnt signaling pathway                                                 | 14 | 0.062 |
|       | FOXA1 transcription factor network                                    | 4  | 0.067 |
|       | Hypoxia-inducible factor in the cardiovascular system                 | 4  | 0.067 |
|       | Latent infection of Homo sapiens with Mycobacterium tuberculosis      | 4  | 0.067 |
|       | Oxidative stress induced gene expression via nrf2                     | 4  | 0.067 |
|       | Phagosomal maturation (early endosomal stage)                         | 4  | 0.067 |
|       | Platelet homeostasis                                                  | 4  | 0.067 |
|       | Regulation of cell cycle progression by plk3                          | 4  | 0.067 |
|       | Repression of pain sensation by the transcriptional regulator dream   | 4  | 0.067 |
|       | Signaling by NOTCH                                                    | 4  | 0.067 |
|       | Validated transcriptional targets of AP1 family members Fra1 and Fra2 | 4  | 0.067 |
|       | Osteopontin-mediated events                                           | 9  | 0.072 |
|       | Regulation of nuclear SMAD2/3 signaling                               | 9  | 0.072 |
|       | Colorectal cancer                                                     | 22 | 0.089 |

### C. MRSA Infection Alone

| Time  | Signaling Pathway                                                            | Uploaded Protein Count | Pathway Upregulated P-Value |
|-------|------------------------------------------------------------------------------|------------------------|-----------------------------|
| 8 hr  | TRAF6 mediated IRF7 activation                                               | 7                      | 0.031                       |
|       | IL-13 signaling                                                              | 5                      | 0.056                       |
|       | Metabolism of proteins                                                       | 5                      | 0.056                       |
|       | Phagosome                                                                    | 5                      | 0.056                       |
|       | TRAF3-dependent IRF activation pathway                                       | 5                      | 0.056                       |
|       | Validated targets of C-MYC transcriptional activation                        | 5                      | 0.056                       |
| 12 hr | Glucocorticoid receptor regulatory network                                   | 13                     | 0.003                       |
|       | Wnt signaling pathway                                                        | 14                     | 0.004                       |
|       | Mets effect on macrophage differentiation                                    | 2                      | 0.008                       |
|       | Alzheimer's disease                                                          | 6                      | 0.010                       |
|       | ErbB2/ErbB3 signaling events                                                 | 12                     | 0.014                       |
|       | Oxidative Stress Induced Senescence                                          | 12                     | 0.014                       |
|       | AKT phosphorylates targets in the cytosol                                    | 7                      | 0.017                       |
|       | Apoptotic signaling in response to dna damage                                | 7                      | 0.017                       |
|       | Cellular responses to stress                                                 | 20                     | 0.021                       |
|       | Calcium signaling in the CD4+ TCR pathway                                    | 3                      | 0.022                       |
|       | Pertussis toxin-insensitive ccr5 signaling in macrophage                     | 3                      | 0.022                       |
|       | Pre-NOTCH Expression and Processing                                          | 3                      | 0.022                       |
|       | Pre-NOTCH Transcription and Translation                                      | 3                      | 0.022                       |
|       | Unfolded Protein Response (UPR)                                              | 3                      | 0.022                       |
|       | Activation of BH3-only proteins                                              | 8                      | 0.026                       |
|       | Calcineurin-regulated NFAT-dependent transcription in lymphocytes            | 8                      | 0.026                       |
|       | Presenilin action in Notch and Wnt signaling                                 | 8                      | 0.026                       |
|       | Colorectal cancer                                                            | 22                     | 0.031                       |
|       | Regulation of nuclear SMAD2/3 signaling                                      | 9                      | 0.037                       |
|       | BH3-only proteins associate with and inactivate anti-apoptotic BCL-2 members | 4                      | 0.042                       |
|       | Basal cell carcinoma                                                         | 4                      | 0.042                       |
|       | FOXA1 transcription factor network                                           | 4                      | 0.042                       |
|       | LKB1 signaling events                                                        | 4                      | 0.042                       |
|       | Oxidative stress induced gene expression via nrf2                            | 4                      | 0.042                       |

|                                                                            |    |       |
|----------------------------------------------------------------------------|----|-------|
| Repression of pain sensation by the transcriptional regulator dream        | 4  | 0.042 |
| Signaling by NOTCH                                                         | 4  | 0.042 |
| The information processing pathway at the ifn beta enhancer                | 4  | 0.042 |
| Amyotrophic lateral sclerosis (ALS)                                        | 10 | 0.049 |
| Direct p53 effectors                                                       | 10 | 0.049 |
| Cellular Senescence                                                        | 17 | 0.051 |
| T cell receptor signaling pathway                                          | 18 | 0.062 |
| AP-1 transcription factor network                                          | 11 | 0.064 |
| Phosphoinositides and their downstream targets                             | 11 | 0.064 |
| Role of Calcineurin-dependent NFAT signaling in lymphocytes                | 11 | 0.064 |
| Signaling mediated by p38-alpha and p38-beta                               | 11 | 0.064 |
| Activation of BAD and translocation to mitochondria                        | 5  | 0.066 |
| Atm signaling pathway                                                      | 5  | 0.066 |
| IL12 signaling mediated by STAT4                                           | 5  | 0.066 |
| Metabolism of proteins                                                     | 5  | 0.066 |
| Regulation of nuclear beta catenin signaling and target gene transcription | 5  | 0.066 |
| S1P2 pathway                                                               | 5  | 0.066 |
| Tsp-1 induced apoptosis in microvascular endothelial cell                  | 5  | 0.066 |
| ATF-2 transcription factor network                                         | 12 | 0.081 |
| Downstream signaling in naïve CD8+ T cells                                 | 12 | 0.081 |
| Intrinsic Pathway for Apoptosis                                            | 12 | 0.081 |
| Activation of the AP-1 family of transcription factors                     | 6  | 0.093 |
| Aurora A signaling                                                         | 6  | 0.093 |
| Cadmium induces dna synthesis and proliferation in macrophages             | 6  | 0.093 |
| FOXM1 transcription factor network                                         | 6  | 0.093 |
| HIF-1-alpha transcription factor network                                   | 6  | 0.093 |

**Table S3: Pathway Overrepresentation Analysis of Differentially Upregulated Host Kinome Responses in pdm2009-MRSA infected cells vs. MRSA infection alone (8-12 hr Post-MRSA Infection)**

| Time  | Signaling Pathway                                                            | Uploaded protein count | Pathway up-regulated p-value |
|-------|------------------------------------------------------------------------------|------------------------|------------------------------|
| 8hr   | Cell death signalling via NRAGE, NRIF and NADE                               | 5                      | 0.005                        |
|       | Caspase Cascade in Apoptosis                                                 | 10                     | 0.007                        |
|       | p75 NTR receptor-mediated signalling                                         | 10                     | 0.007                        |
|       | Intrinsic Pathway for Apoptosis                                              | 12                     | 0.014                        |
|       | Caspase cascade in apoptosis                                                 | 3                      | 0.022                        |
|       | Apoptosis                                                                    | 14                     | 0.026                        |
|       | p75(NTR)-mediated signaling                                                  | 14                     | 0.026                        |
|       | CDC42 signaling events                                                       | 15                     | 0.033                        |
|       | Toxoplasmosis                                                                | 31                     | 0.037                        |
|       | BH3-only proteins associate with and inactivate anti-apoptotic BCL-2 members | 4                      | 0.042                        |
|       | Stress induction of hsp regulation                                           | 4                      | 0.042                        |
|       | TRAF6 mediated IRF7 activation in TLR7/8 or 9 signaling                      | 4                      | 0.042                        |
|       | p75NTR recruits signalling complexes                                         | 4                      | 0.042                        |
| 12 hr | Cell death signalling via NRAGE, NRIF and NADE                               | 5                      | 0.003                        |
|       | p75 NTR receptor-mediated signalling                                         | 10                     | 0.016                        |
|       | TRAF6 mediated IRF7 activation in TLR7/8 or 9 signaling                      | 4                      | 0.017                        |
|       | TRAF6 mediated IRF7 activation                                               | 7                      | 0.018                        |
|       | Phagosome                                                                    | 5                      | 0.038                        |

**Table S4: GO Analysis of Host Kinome Responses in Infected Samples (8-12 hr Post-MRSA Infection)**

**A. pdm2009-MRSA Infection**

| Time | Signaling Pathway                                                | Uploaded Protein Count | Pathway Upregulated P-Value |
|------|------------------------------------------------------------------|------------------------|-----------------------------|
| 8 hr | regulation of inflammatory response                              | 6                      | 0.003                       |
|      | positive regulation of release of cytochrome c from mitochondria | 5                      | 0.011                       |

|       |                                                                     |    |       |
|-------|---------------------------------------------------------------------|----|-------|
|       | positive regulation of interleukin-6 production                     | 3  | 0.013 |
|       | intrinsic apoptotic signaling pathway                               | 12 | 0.037 |
|       | intrinsic apoptotic signaling pathway in response to DNA damage     | 7  | 0.055 |
|       | cellular protein metabolic process                                  | 5  | 0.087 |
|       | negative regulation of protein catabolic process                    | 5  | 0.087 |
|       | neuron apoptotic process                                            | 5  | 0.087 |
|       | positive regulation of interferon-alpha production                  | 5  | 0.087 |
|       | positive regulation of peptidyl-tyrosine phosphorylation            | 5  | 0.087 |
|       | response to progesterone                                            | 5  | 0.087 |
|       | positive regulation of cell migration                               | 11 | 0.087 |
|       | extrinsic apoptotic signaling pathway in absence of ligand          | 8  | 0.091 |
|       |                                                                     |    |       |
|       | release of cytochrome c from mitochondria                           | 8  | 0.091 |
| 12 hr | positive regulation of neuron apoptotic process                     | 10 | 0.004 |
|       | cellular response to DNA damage stimulus                            | 13 | 0.017 |
|       | positive regulation of interferon-alpha production                  | 5  | 0.018 |
|       | positive regulation of tumor necrosis factor production             | 6  | 0.033 |
|       | transforming growth factor beta receptor signaling pathway          | 11 | 0.043 |
|       | ATP catabolic process                                               | 3  | 0.048 |
|       | ER overload response                                                | 3  | 0.048 |
|       | ion transport                                                       | 3  | 0.048 |
|       | positive regulation of interleukin-6 production                     | 3  | 0.048 |
|       | positive regulation of interleukin-8 production                     | 3  | 0.048 |
|       | positive regulation of type I interferon-mediated signaling pathway | 3  | 0.048 |
|       |                                                                     |    |       |
|       | protein localization to nucleus                                     | 3  | 0.048 |

|                                                                 |    |       |
|-----------------------------------------------------------------|----|-------|
| proteolysis                                                     | 3  | 0.048 |
| response to unfolded protein                                    | 3  | 0.048 |
| B cell homeostasis                                              | 7  | 0.052 |
| intrinsic apoptotic signaling pathway in response to DNA damage | 7  | 0.052 |
| regulation of apoptotic process                                 | 12 | 0.059 |
| release of cytochrome c from mitochondria                       | 8  | 0.076 |
| positive regulation of apoptotic process                        | 24 | 0.076 |
| transcription from RNA polymerase II promoter                   | 13 | 0.077 |
| B cell activation                                               | 4  | 0.088 |
| T cell homeostasis                                              | 4  | 0.088 |
| erythrocyte differentiation                                     | 4  | 0.088 |
| mammary gland development                                       | 4  | 0.088 |
| negative regulation of protein phosphorylation                  | 4  | 0.088 |
| positive regulation of interferon-beta production               | 4  | 0.088 |
| regulation of protein phosphorylation                           | 4  | 0.088 |
| response to UV                                                  | 4  | 0.088 |
| transport                                                       | 4  | 0.088 |
| type I interferon biosynthetic process                          | 4  | 0.088 |

## B. pdm2009 Infection Alone

| Time | Signaling Pathway                                           | Uploaded Protein Count | Pathway Upregulated P-Value |
|------|-------------------------------------------------------------|------------------------|-----------------------------|
| 8 hr | neuron apoptotic process                                    | 5                      | 0.030                       |
|      | regulation of transcription from RNA polymerase II promoter | 13                     | 0.037                       |
|      | defense response to Gram-positive bacterium                 | 3                      | 0.067                       |
|      | multicellular organism growth                               | 3                      | 0.067                       |

|       |                                                                                 |    |       |
|-------|---------------------------------------------------------------------------------|----|-------|
|       | positive regulation of interleukin-6 production                                 | 3  | 0.067 |
|       | positive regulation of protein oligomerization                                  | 3  | 0.067 |
|       | regulation of mitochondrial membrane permeability involved in apoptotic process | 3  | 0.067 |
|       | in utero embryonic development                                                  | 15 | 0.068 |
|       | inflammatory response                                                           | 20 | 0.073 |
| 12 hr | positive regulation of tumor necrosis factor production                         | 6  | 0.021 |
|       | response to cAMP                                                                | 6  | 0.021 |
|       | transforming growth factor beta receptor signaling pathway                      | 11 | 0.025 |
|       | cellular response to calcium ion                                                | 3  | 0.035 |
|       | defense response to Gram-positive bacterium                                     | 3  | 0.035 |
|       | negative regulation of type I interferon production                             | 3  | 0.035 |
|       | nitric oxide biosynthetic process                                               | 3  | 0.035 |
|       | receptor-mediated endocytosis                                                   | 3  | 0.035 |
|       | response to immobilization stress                                               | 3  | 0.035 |
|       | somitogenesis                                                                   | 3  | 0.035 |
|       | defense response to virus                                                       | 8  | 0.050 |
|       | release of cytochrome c from mitochondria                                       | 8  | 0.050 |
|       | defense response to bacterium                                                   | 4  | 0.066 |
|       | interaction with host                                                           | 4  | 0.066 |
|       | phagosome maturation                                                            | 4  | 0.066 |
|       | positive regulation of interferon-beta production                               | 4  | 0.066 |
|       | positive regulation of vasodilation                                             | 4  | 0.066 |
|       | response to UV                                                                  | 4  | 0.066 |
|       | transport                                                                       | 4  | 0.066 |

|  |                                                 |    |       |
|--|-------------------------------------------------|----|-------|
|  | regulation of cell proliferation                | 15 | 0.075 |
|  | negative regulation of cell proliferation       | 22 | 0.085 |
|  | positive regulation of neuron apoptotic process | 10 | 0.093 |
|  | response to hypoxia                             | 10 | 0.093 |

### C. MRSA Infection Alone

| Time  | Signaling Pathway                                                                                            | Uploaded Protein Count | Pathway Upregulated P-Value |
|-------|--------------------------------------------------------------------------------------------------------------|------------------------|-----------------------------|
| 8 hr  | positive regulation of interferon-alpha production                                                           | 5                      | 0.006                       |
|       | defense response to Gram-positive bacterium                                                                  | 3                      | 0.007                       |
|       | negative regulation of protein phosphorylation                                                               | 4                      | 0.025                       |
|       | positive regulation of interferon-beta production                                                            | 4                      | 0.025                       |
|       | regulation of immune response                                                                                | 4                      | 0.025                       |
|       | cellular protein metabolic process                                                                           | 5                      | 0.054                       |
|       | neuron apoptotic process                                                                                     | 5                      | 0.054                       |
|       | oxidation-reduction process                                                                                  | 5                      | 0.054                       |
|       | positive regulation of peptidyl-tyrosine phosphorylation                                                     | 5                      | 0.054                       |
|       | positive regulation of neuron projection development                                                         | 6                      | 0.093                       |
|       | protein homooligomerization                                                                                  | 6                      | 0.093                       |
|       | regulation of inflammatory response                                                                          | 6                      | 0.093                       |
| 12 hr | ER overload response                                                                                         | 3                      | 0.001                       |
|       | positive regulation of mitochondrial outer membrane permeabilization involved in apoptotic signaling pathway | 4                      | 0.002                       |
|       | transcription from RNA polymerase II promoter                                                                | 13                     | 0.002                       |
|       | Wnt signaling pathway                                                                                        | 8                      | 0.002                       |

|                                                                                                              |    |       |
|--------------------------------------------------------------------------------------------------------------|----|-------|
| release of cytochrome c from mitochondria                                                                    | 8  | 0.002 |
| negative regulation of canonical Wnt signaling pathway                                                       | 5  | 0.005 |
| positive regulation of release of cytochrome c from mitochondria                                             | 5  | 0.005 |
| positive regulation of transcription from RNA polymerase II promoter                                         | 39 | 0.007 |
| positive regulation of apoptotic process                                                                     | 24 | 0.009 |
| positive regulation of transcription, DNA-templated                                                          | 24 | 0.009 |
| activation of signaling protein activity involved in unfolded protein response                               | 3  | 0.021 |
| cellular response to calcium ion                                                                             | 3  | 0.021 |
| endoplasmic reticulum unfolded protein response                                                              | 3  | 0.021 |
| negative regulation of glycogen biosynthetic process                                                         | 3  | 0.021 |
| positive regulation of protein catabolic process                                                             | 3  | 0.021 |
| positive regulation of protein oligomerization                                                               | 3  | 0.021 |
| regulation of mitochondrial membrane permeability                                                            | 3  | 0.021 |
| regulation of mitochondrial membrane permeability involved in apoptotic process                              | 3  | 0.021 |
| regulation of transcription, DNA-templated                                                                   | 37 | 0.023 |
| extrinsic apoptotic signaling pathway in absence of ligand                                                   | 8  | 0.025 |
| positive regulation of intrinsic apoptotic signaling pathway                                                 | 9  | 0.035 |
| positive regulation of protein insertion into mitochondrial membrane involved in apoptotic signaling pathway | 9  | 0.035 |
| epithelial to mesenchymal transition                                                                         | 4  | 0.041 |
| glycogen metabolic process                                                                                   | 4  | 0.041 |
| positive regulation of neuron apoptotic process                                                              | 10 | 0.048 |
| sequence-specific DNA binding                                                                                | 17 | 0.049 |
| transforming growth factor beta receptor signaling pathway                                                   | 11 | 0.062 |
| cellular protein metabolic process                                                                           | 5  | 0.064 |
| cellular response to UV                                                                                      | 5  | 0.064 |
| neuron apoptotic process                                                                                     | 5  | 0.064 |

|                                                                              |    |       |
|------------------------------------------------------------------------------|----|-------|
| response to progesterone                                                     | 5  | 0.064 |
| intrinsic apoptotic signaling pathway                                        | 12 | 0.078 |
| regulation of sequence-specific DNA binding<br>transcription factor activity | 6  | 0.091 |
| response to cAMP                                                             | 6  | 0.091 |
| cellular response to DNA damage stimulus                                     | 13 | 0.096 |
| negative regulation of transcription, DNA-templated                          | 13 | 0.096 |
